# Supplementary material for: Pharmacological AMPK activation induces transcriptional responses congruent to exercise in skeletal and cardiac muscle, adipose tissues and liver
Source: PubMed Central journal article supplement (PMC6392219; doi:10.1371/journal.pone.0211568), 2019-02-27
Supplement: pone.0211568.s004.pdf [file pone.0211568.s004.pdf]

S4 Fig.

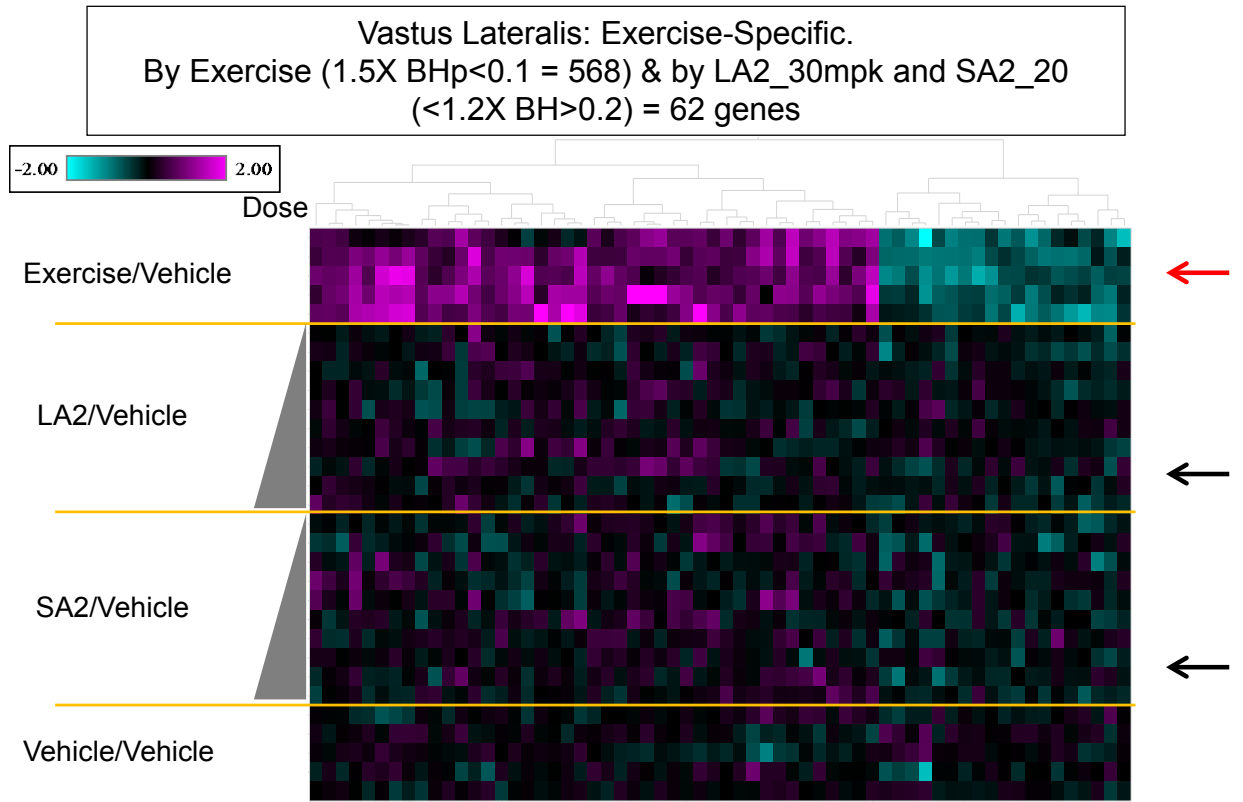

V\_ExerSpecific\_Exer1.5XBH0.1\_LA2\_30\_and\_SA2\_20\_1.2XBH0.2\_62
