# Supplementary material for: Pharmacological AMPK activation induces transcriptional responses congruent to exercise in skeletal and cardiac muscle, adipose tissues and liver
Source: PubMed Central journal article supplement (PMC6392219; doi:10.1371/journal.pone.0211568), 2019-02-27
Supplement: pone.0211568.s017.pdf [file pone.0211568.s017.pdf]

S17 Fig.

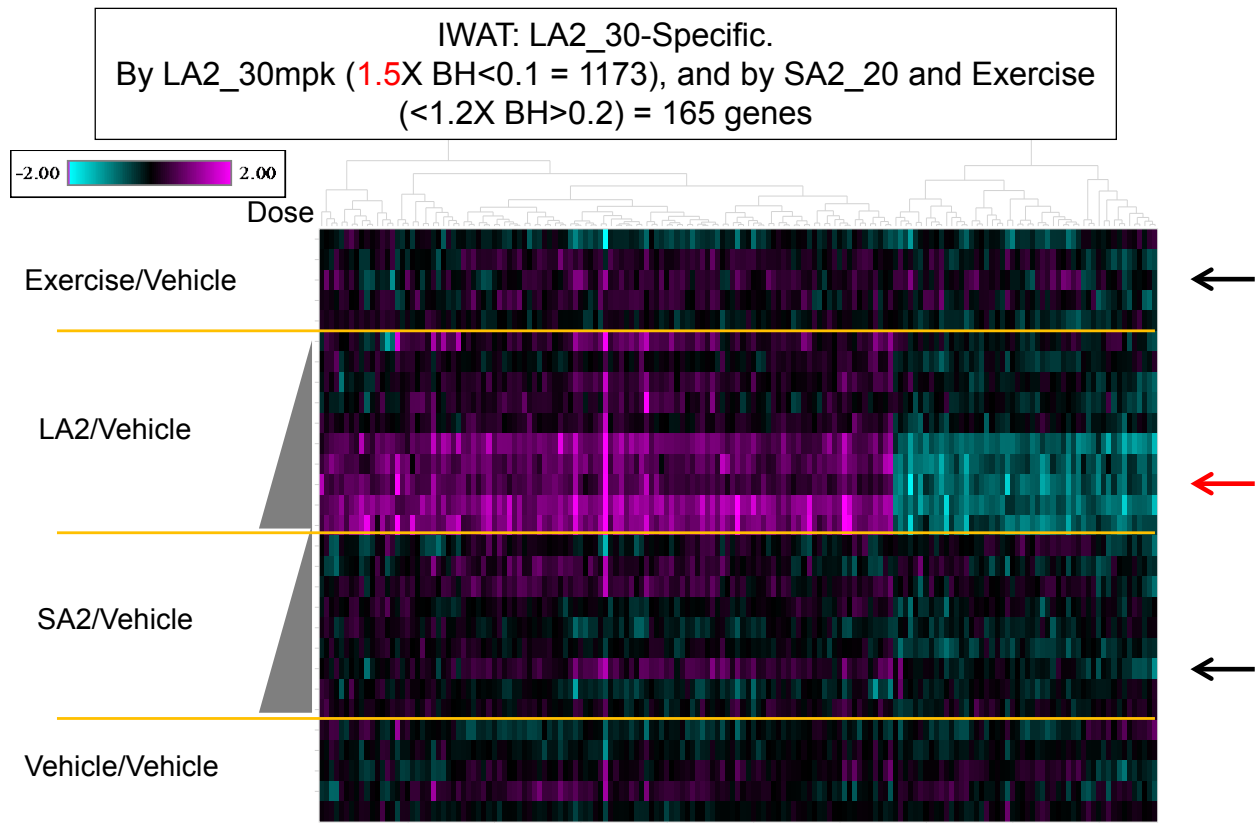

I\_LA2\_30Specific\_LA2\_30\_1.5XBH0.1\_SA2\_20\_and\_Exer\_1.2XBH0.2\_165
