# Supplementary material for: Pharmacological AMPK activation induces transcriptional responses congruent to exercise in skeletal and cardiac muscle, adipose tissues and liver
Source: PubMed Central journal article supplement (PMC6392219; doi:10.1371/journal.pone.0211568), 2019-02-27

S19 Fig.

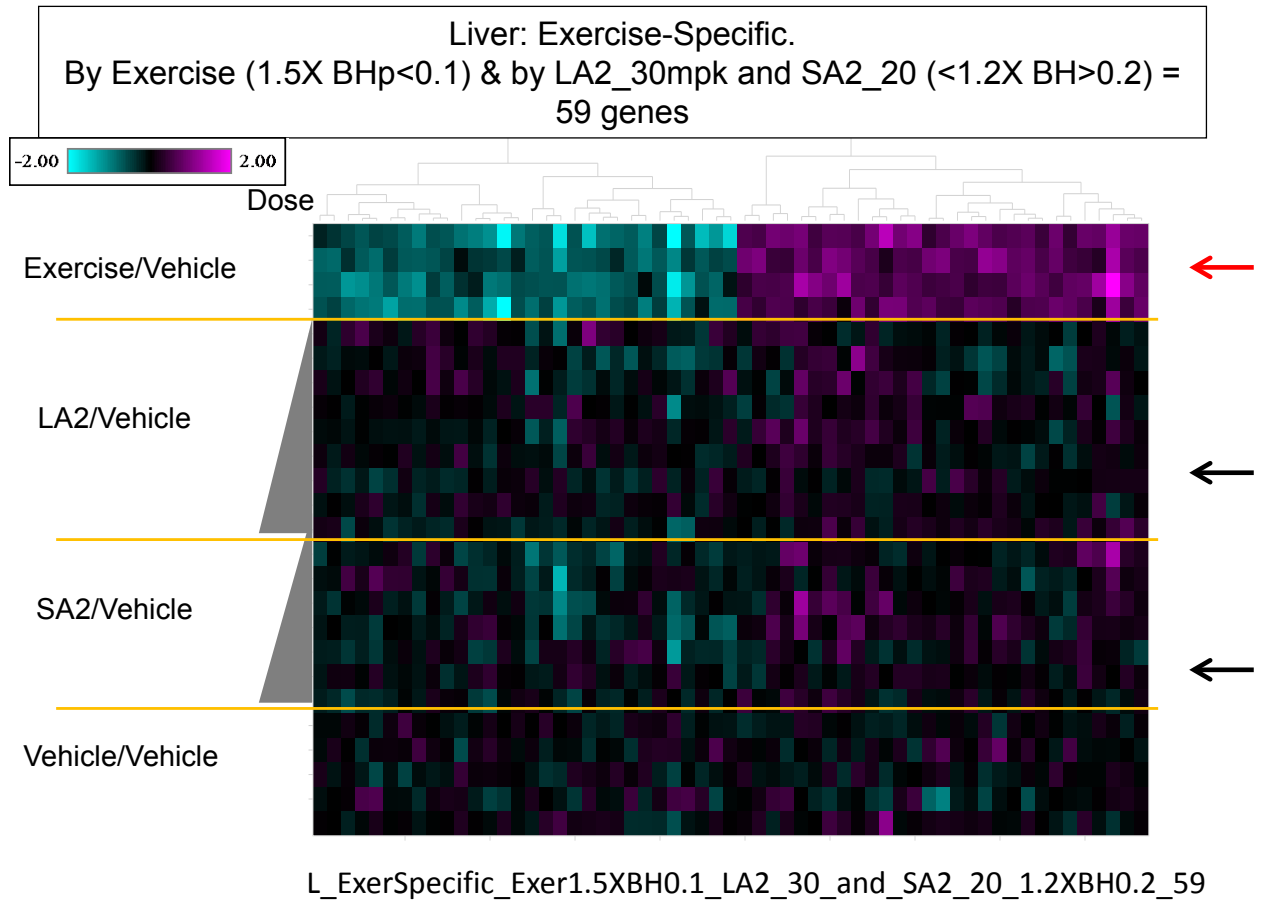

Supplement: pone.0211568.s019.pdf [file pone.0211568.s019.pdf]
