# Supplementary material for: Pharmacological AMPK activation induces transcriptional responses congruent to exercise in skeletal and cardiac muscle, adipose tissues and liver
Source: PLOS journal article supplement (doi:10.1371/journal.pone.0211568), 2019-02-27
Supplement: S8 (10.1371/journal.pone.0211568.s008) [file journal.pone.0211568.s008]

S8 Fig.

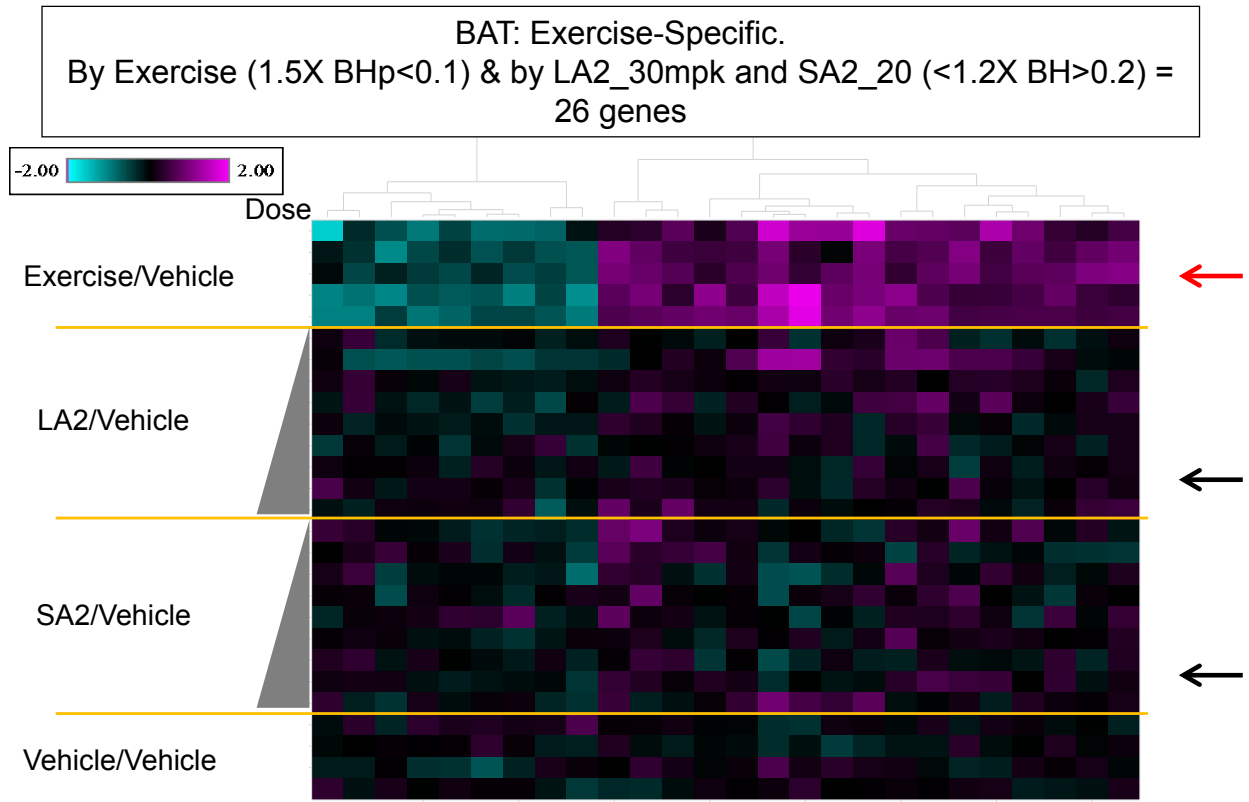

BV\_ExerSpecific\_Exer1.5XBH0.1\_LA2\_30\_and\_SA2\_20\_1.2XBH0.2\_26
