# Supplementary material for: Pharmacological AMPK activation induces transcriptional responses congruent to exercise in skeletal and cardiac muscle, adipose tissues and liver
Source: PLOS journal article supplement (doi:10.1371/journal.pone.0211568), 2019-02-27
Supplement: S20 (10.1371/journal.pone.0211568.s020) [file journal.pone.0211568.s020]

S20 Fig.

Liver: "AMPK Activator"-Specific.  
By LA2\_30mpk (1.5X BH<0.1), by SA2\_20 (1.2X BH<0.1), and by Exercise  
(<1.2X BH>0.2) = 13 genes

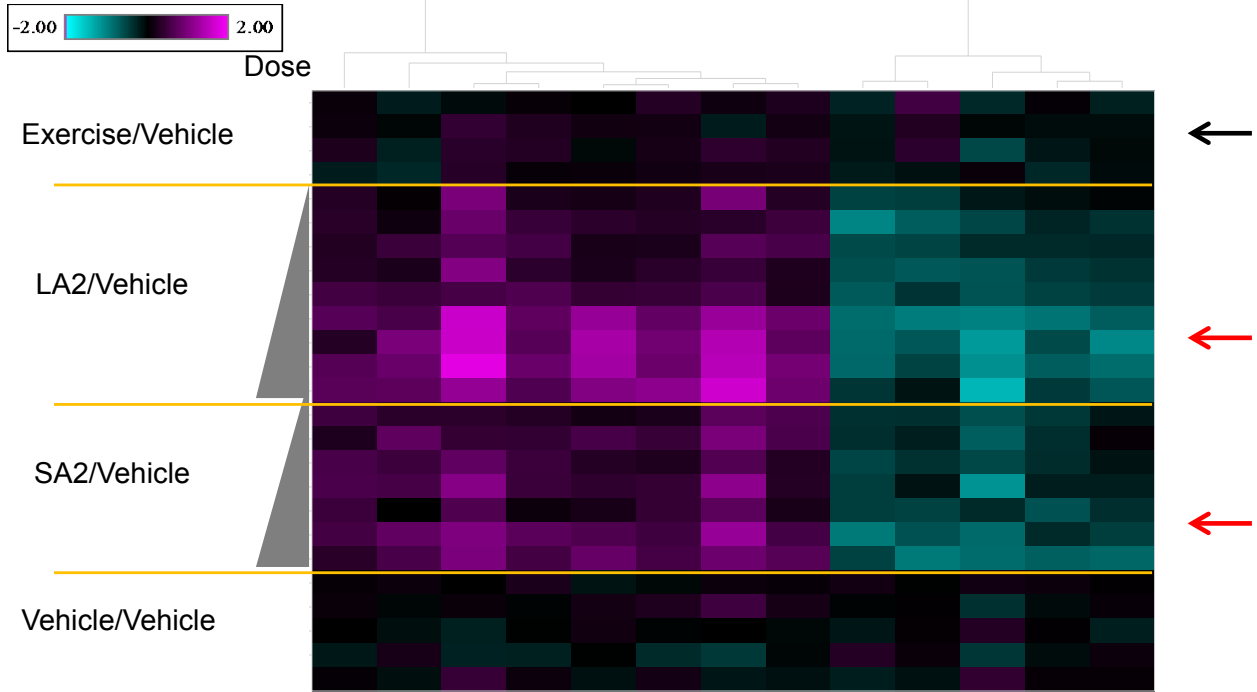

L\_AMPKspecific\_LA2\_30\_1.5XBH0.1\_SA2\_20\_1.2XBH0.1\_NOT\_Exer\_1.2XBH0.2\_13
